# Supplementary material for: webTDat: A Web-Based, Real-Time, 3D Visualization Framework for Mesoscopic Whole-Brain Images
Source: Front Neuroinform. 2021 Jan 13;14:542169. doi: 10.3389/fninf.2020.542169 (PMC7838507; doi:10.3389/fninf.2020.542169)
Supplement: Supplementary file 1 [file Table_1.XLSX]

## Sheet: Sheet1
	Time consumption for TDat(512pix dicing)-fixed size VOI visulization (unit: ms)												Time consumption for TDat(128pix dicing)-fixed size VOI visulization (unit: ms)
	VOI size	100x100x100			200x200x200			500x500x500					VOI size	100x100x100			200x200x200			500x500x500
		begin	end	time_c	begin	end	time_c	begin	end	time_c				begin	end	time_c	begin	end	time_c	begin	end	time_c
	1	12488	14503	2015	18308	18811	503	8795	14115	5320			1	8229	8513	284	11909	12412	503	29492	34493	5001
	2	21656	22403	747	32091	33424	1333	28474	34819	6345			2	11364	11653	289	19229	19598	369	37244	41340	4096
	3	26008	27153	1145	38475	39185	710	50634	53355	2721			3	16388	16685	297	23197	23708	511	55988	60111	4123
	4	31001	31362	361	44144	46906	2762	76764	85082	8318			4	17868	18115	247	25997	26609	612	70613	74879	4266
	5	35193	35524	331	51700	59814	8114	93083	102280	9197			5	19188	19422	234	28197	28876	679	84101	91062	6961
	6	40368	41158	790	671795	673999	2204	110971	117419	6448			6	20444	20664	220	33573	33996	423	92468	98266	5798
	7	45089	45497	408	687332	689595	2263	127195	137169	9974			7	21820	22088	268	36245	36681	436	111996	116503	4507
	8	50944	52052	1108	694611	696376	1765	151867	158641	6774			8	23228	23673	445	41022	41881	859	118621	125459	6838
	9	56984	57749	765	702515	704892	2377	172555	179929	7374			9	24564	24887	323	44046	44387	341	127460	131621	4161
	10	65321	65673	352	714707	715434	727	187652	197928	10276			10	25756	25957	201	48886	49168	282	142139	146198	4059
	11	69248	69600	352	740774	745063	4289	236676	243764	7088			11	27644	28042	398	54454	55195	741	148309	153840	5531
	12	73553	77167	3614	751252	753922	2670	279380	284311	4931			12	29053	29280	227	61142	61668	526	155700	159943	4243
	13	81536	81895	359	761676	763796	2120	294747	303238	8491			13	30332	30620	288	63902	64558	656	168861	173631	4770
	14	87081	90144	3063	770370	771729	1359	315003	323577	8574			14	31644	31873	229	67111	67434	323	181661	191085	9424
	15	93816	94549	733	787075	789563	2488	332283	337147	4864			15	36323	36559	236	69269	69839	570	193364	197262	3898
	16	98137	101415	3278	798779	799479	700	351235	356266	5031			16	39468	39731	263	74110	74603	493	207308	212077	4769
	17	105648	106598	950	804852	805718	866	367362	374501	7139			17	41476	41819	343	78933	79483	550	231086	235860	4774
	18	110416	111052	636	814723	816749	2026	412586	419208	6622			18	43436	43670	234	80966	81495	529	238100	242191	4091
	19	115472	116091	619	857491	861370	3879	455035	462803	7768			19	48365	48664	299	83262	83612	350	244244	252270	8026
	20	121081	122248	1167	866260	867173	913	470634	477836	7202			20	58076	58562	486	85998	86731	733	257116	260819	3703
	21	127832	128280	448	901843	902567	724	485699	492366	6667			21	59428	59581	153	88806	89280	474	262196	266498	4302
	22	132008	132360	352	908228	911578	3350	500675	508458	7783			22	62740	63038	298	91486	92363	877	268996	275044	6048
	23	136649	137151	502	917459	918264	805	518324	524543	6219			23	64100	64242	142	94942	95203	261	278301	282903	4602
	24	140792	145375	4583	923139	925453	2314	536666	545267	8601			24	65716	65876	160	101390	102055	665	284133	289002	4869
	average			1194.92			2135.88			7071.96			average			273.5			531.792			5119.17

## Sheet: Sheet2
	Time consumption for webTDat-fixed size VOI visulization (local) (unit: ms)
	VOI size	100x100x100								200x200x200								500x500x500
		1 bits	2 bits	3 bits	4bits	5 bits	6 bits	7 bits	8 bits	1 bits	2 bits	3 bits	4bits	5 bits	6 bits	7 bits	8 bits	1 bits	2 bits	3 bits	4bits	5 bits	6 bits	7 bits	8 bits
	1	138	175	211	229	262	296	327	358	339	488	599	623	674	705	725	757	1628	2166	2800	3446	4310	5380	6470	7523
	2	117	132	163	195	228	262	296	327	186	218	243	288	361	368	401	435	1782	2646	3634	4819	6263	7679	9117	10504
	3	125	176	219	225	259	292	325	359	248	309	404	520	683	863	1019	1190	1073	1489	1848	2241	2616	2986	3386	3814
	4	52	61	94	127	160	193	227	260	184	208	235	266	299	333	366	421	1540	2297	3089	4010	5317	6746	8196	9622
	5	115	151	187	208	242	276	309	342	158	192	226	287	322	327	360	377	1558	2187	2785	3380	4348	5318	6375	7528
	6	123	154	180	210	264	370	449	535	251	293	329	359	386	425	479	526	1242	1830	2319	2896	3615	4301	5008	5785
	7	95	103	136	170	202	236	269	303	181	222	250	287	314	345	372	404	1316	1910	2439	3006	3651	4240	5202	6255
	8	75	87	120	154	187	221	254	287	274	334	395	414	488	523	557	575	1653	2447	3339	4503	5867	7357	8813	10349
	9	111	125	158	191	224	257	291	350	255	292	347	454	599	737	863	1011	1705	2537	3302	4401	5710	7028	8249	9624
	10	90	101	134	168	200	233	252	299	235	275	309	368	468	642	799	931	1523	2159	2710	3363	4155	5261	6129	7299
	11	122	141	170	203	237	270	347	347	240	287	347	354	425	461	494	506	1455	2185	2842	3487	4370	5474	6601	7730
	12	82	91	120	153	187	220	253	286	327	373	408	445	488	554	658	765	1545	2306	3033	3981	5239	6616	7976	9311
	13	60	99	132	139	172	206	239	270	193	223	254	284	324	390	439	514	1461	2237	3060	4020	5213	6500	7712	8976
	14	74	80	111	144	178	211	245	278	276	310	352	437	519	651	802	928	1411	2004	2451	3170	4239	5498	6703	7926
	15	99	157	160	193	227	260	308	327	179	208	234	258	291	325	358	391	1574	2126	2532	3032	3790	4725	5768	6756
	16	114	132	165	199	232	266	298	331	211	241	274	329	378	431	487	536	1202	1755	2219	2758	3489	4323	5288	6266
	17	149	163	187	238	311	353	385	428	239	283	314	346	379	413	443	486	1343	2002	2814	3792	4863	5960	7111	8214
	18	137	157	209	258	311	365	418	477	209	239	267	294	326	403	438	474	1626	2493	3446	4746	6262	7815	9351	10900
	19	94	111	144	177	211	244	278	311	248	280	321	383	424	451	550	642	1616	2517	2924	3519	4205	5471	6930	8403
	20	69	80	113	145	179	212	246	279	138	173	205	240	270	298	330	359	1563	2347	3280	4136	5361	6678	8088	9500
	21	62	70	104	137	170	203	237	268	177	209	236	278	318	350	382	422	1487	2186	3072	4215	5441	6656	7845	8954
	22	87	95	129	162	195	229	260	292	266	303	341	403	419	495	531	557	1299	1897	2402	3128	4029	5057	6093	7188
	23	112	136	149	194	251	267	327	364	189	224	249	273	317	391	491	566	1714	2630	3757	5045	6436	7862	9206	10573
	24	113	131	163	196	256	289	297	330	183	213	245	271	315	383	498	568	1563	2183	2735	3307	4213	5309	6411	7561
	average	100.625	121.167	152.417	183.958	222.708	259.625	297.375	333.667	224.417	266.542	307.667	352.542	407.792	469.333	535.083	597.542	1494.96	2189	2868	3683.38	4708.42	5843.33	7001.17	8190.04

## Sheet: Sheet3
	Time consumption for webTDat-fixed size VOI visulization (network) (unit: ms)
	VOI size	100x100x100								200x200x200								500x500x500
		1 bits	2 bits	3 bits	4bits	5 bits	6 bits	7 bits	8 bits	1 bits	2 bits	3 bits	4bits	5 bits	6 bits	7 bits	8 bits	1 bits	2 bits	3 bits	4bits	5 bits	6 bits	7 bits	8 bits
	1	129	159	187	216	243	369	406	451	113	163	209	262	306	352	398	441	2013	3638	5881	9142	12665	16805	20689	24340
	2	63	118	153	170	232	237	270	304	297	633	833	1039	1275	1545	1910	2159	2419	4089	5665	7326	9375	13448	17466	21513
	3	63	74	105	186	221	273	345	408	263	367	520	637	761	986	1205	1398	1988	3630	5058	6563	8159	9534	11590	13975
	4	95	123	147	170	203	233	266	303	381	751	1063	1313	1590	1968	2293	2600	1835	3396	4726	6290	8406	11325	14451	17590
	5	61	92	113	133	168	201	271	355	306	411	498	604	700	773	850	924	2017	3486	5059	6526	8224	10274	13168	16323
	6	156	226	273	326	333	365	400	425	249	427	547	671	775	866	976	1104	1981	3247	4784	6411	8598	12243	15562	18829
	7	197	214	236	272	359	370	403	437	445	674	880	1036	1223	1353	1567	1694	2368	4179	5843	7698	10132	14091	18082	22310
	8	110	158	188	222	256	286	315	365	473	848	1111	1342	1669	2150	2518	2926	1535	2416	3415	4500	5495	6293	7328	8489
	9	59	76	113	142	217	225	276	276	145	196	243	299	355	412	463	522	1542	2498	3531	4622	5791	6814	7662	8462
	10	53	97	106	144	267	314	419	553	412	594	769	978	1205	1419	1775	2007	1738	2986	4154	5397	6628	7715	9107	10743
	11	84	103	125	157	191	224	264	305	530	772	1131	1426	1689	2136	2480	2787	1464	2495	3499	4474	5337	6176	7218	8313
	12	86	104	136	170	202	235	273	315	450	743	1017	1406	1739	2088	2575	2920	1786	3120	4745	6948	9675	12755	15813	18785
	13	88	112	132	199	236	261	292	387	427	668	1069	1329	1592	1798	2215	2496	2376	3901	5752	8151	11743	15930	20032	24009
	14	132	168	197	232	279	328	373	388	242	296	348	442	547	708	984	1160	1539	2556	3563	4664	5680	7444	9580	11939
	15	119	137	164	189	221	254	337	347	235	310	371	432	516	627	721	842	2302	4017	5624	8001	11785	16269	21255	25925
	16	96	131	164	197	330	358	410	431	214	277	335	402	458	545	661	825	1867	3257	4556	5899	7404	10061	13139	16633
	17	167	196	251	273	306	337	371	390	222	266	304	342	399	444	512	558	1883	3350	4817	6267	8019	11000	14143	17562
	18	97	123	146	180	214	285	333	372	432	517	577	657	722	792	877	931	1971	3226	4487	5948	7669	9726	12296	15250
	19	85	102	137	169	203	236	290	322	181	228	281	347	460	670	772	874	1276	2178	3008	3835	4666	5561	6586	7891
	20	154	179	205	240	267	332	380	417	371	641	965	1231	1463	1780	2212	2521	1108	1854	2704	3443	4205	4955	5825	6793
	21	138	166	193	227	288	353	426	596	249	461	556	673	755	861	967	1040	1465	2630	3482	4457	5388	6295	7068	7776
	22	234	263	298	337	380	453	547	635	291	420	621	820	1192	1433	1691	1900	1936	3300	4684	6285	8613	12022	15549	19152
	23	25	33	64	95	172	179	233	272	214	278	446	531	633	707	775	828	1327	2227	3525	4569	5609	6834	8532	10579
	24	126	164	196	221	261	288	315	353	342	408	471	568	660	822	953	1126	2412	4163	5870	7929	11010	14702	18835	23101
	average	109.042	138.25	167.875	202.792	252.042	291.5	342.292	391.958	311.833	472.875	631.875	782.792	945.167	1134.79	1347.92	1524.29	1839.5	3159.96	4518	6056.04	7928.17	10344.7	12957.3	15678.4

## Sheet: Sheet4
	Time consumption for webTDat radom-size VOI visulization (network) (unit: ms)
		1 bits	2 bits	3 bits	4bits	5 bits	6 bits	7 bits	8 bits
	1	298	307	367	447	562	713	921	1161
	2	371	493	636	800	1030	1326	1726	2182
	3	423	595	781	1020	1302	1628	2108	2610
	4	294	412	544	669	865	1080	1425	1712
	5	300	437	623	772	1038	1349	1667	1976
	6	127	187	250	328	425	573	732	893
	7	360	608	842	1092	1436	1796	2238	2707
	8	165	232	364	443	563	761	938	1276
	9	260	396	512	717	902	1130	1412	1687
	10	162	282	437	552	713	933	1134	1329
	11	410	469	538	622	748	929	1162	1489
	12	268	466	649	797	1068	1425	1762	2070
	13	78	103	167	189	230	279	398	460
	14	154	254	401	553	715	879	1090	1359
	15	333	494	649	838	1101	1416	1807	2209
	16	533	817	1089	1394	1803	2248	2799	3429
	17	450	736	1002	1328	1755	2243	2776	3287
	18	300	386	486	596	791	1031	1285	1656
	19	186	335	474	577	748	983	1199	1405
	20	512	761	1029	1304	1647	2100	2614	3116
	21	508	722	893	1098	1377	1774	2201	2632
	22	366	522	718	980	1218	1500	1853	2191
	23	304	490	592	739	911	1249	1528	1904
	24	255	481	626	851	1067	1434	1796	2126
	average	309.042	457.708	611.208	779.417	1000.62	1282.46	1607.12	1952.75
